the book also contains a "Select Bibliography," a dozen illustrations, and two maps, it would make good college collateral reading. Like Gage's own book, it was first published in London.

Avalon, New Jersey

ARTHUR P. WHITAKER

*After Kino: Jesuit Missions in Northwestern New Spain, 1711-1767.*

By JOHN AUGUSTINE DONOHUE, S.J. Rome, 1969. Jesuit Historical Institute. Sources and Studies for the History of the Americas. Map. Notes. Bibliography. Index. Pp. iv, 183. Cloth. \$6.00. Paper. \$4.20.

This sparkling little volume is intended to answer the question: What happened to the missions of northern New Spain in the year 1767? It is well known that a very vigorous and successful system of missions was by that time 176 years old. Tapia had begun their full activity as early as 1591. River by river, tribe by tribe, the advance went northward. Like Kino, Pérez de Ribas was but a leader to guide the system that finally reached from the Cahitas to the Apaches. They all kept their records, and the missionaries' success was due in large part to their close ties and common methods in trying circumstances.

But there was a little word, "secular." The Indians never paid the tithe. Men wise in "business" objectives began very early to demand of the Indians a little hard cash and to call for secularist economics. This went on in the constant advance from Sinaloa to the Gila and Bill Williams Creek. Seri and Apache, wily and quick to fight, were yet wise enough to resist surrender to the white. In spite of their fighting power, they made no general war.

The suppression of the Jesuits (1767) had the merest touch of a mercantile motive about it. Although several scholars have suggested that it was something more than elegant manners, Father Donohue does not enter that area. Instead he has produced a little masterpiece in Indian history. As a researcher his work follows his model, Herbert E. Bolton, and his high objectivity can be traced back to the first mention of the "old master." The book is well worth study; indeed, it is difficult to put down.

Xavier College

W. EUGENE SHIELDS, S.J.
